# Supplementary material for: Alterations of the intestinal mucus layer correlate with dysbiosis and immune dysregulation in human Type 1 Diabetes
Source: PubMed Central journal article supplement — eBioMedicine. 2023 Apr 14;91:104567. doi: 10.1016/j.ebiom.2023.104567 (PMC10139895; doi:10.1016/j.ebiom.2023.104567), 2023-04-14
Supplement: mmc1.pdf [file mmc1.pdf]

| Cohort           | n  | age        | women/men | new onset T1D | long-lasting T1D |
|------------------|----|------------|-----------|---------------|------------------|
| T1D patients     | 17 | 34.5 ± 3.0 | 13/4      | 3             | 14               |
| Healthy controls | 16 | 43.3 ± 3.5 | 8/7       | NA            | NA               |

**Table S1: Demographic Data**

All individuals recruited for the study underwent EGD for diagnostic purposes. Exclusion criteria for both HCs and T1D patients were treatment with antibiotics or corticosteroids in the 3 months before EGD and history of gastroenteritis, gastric ulcer, irritable bowel disease, celiac disease, inflammatory bowel disease, and gastric and colorectal cancers. New onset T1D: <6 months from diagnosis; long-lasting T1D: ≥6 months from diagnosis. Some T1D patient (5 out of 19) were also affected by celiac disease (CD).

| Patient Code | Age (years) | Sex | Disease duration | Disease type | AutoAbs              | HbA1c | GI symptoms          | Celiac Disease | Other Autoimmune diseases                      |
|--------------|-------------|-----|------------------|--------------|----------------------|-------|----------------------|----------------|------------------------------------------------|
| J1D003       | 25          | F   | <6 months        | NO           | GAD65                | 10.2  | dyspepsia            | no             | no                                             |
| J1D005       | 33          | M   | 1 year           | LS           | ND                   | 6.1   | none                 | no             | no                                             |
| J1D006       | 54          | F   | 19 years         | LS           | ND                   | 7.4   | dyspepsia            | no             | Hashimoto thyroiditis                          |
| J1D007       | 30          | F   | 9 years          | LS           | INS                  | 7.4   | dyspepsia, pyrosis   | no             | Hashimoto thyroiditis                          |
| J1D008       | 24          | F   | 7 years          | LS           | ND                   | 6.6   | epigastric pain      | no             | no                                             |
| J1D012       | 23          | M   | <6 months        | NO           | ICA,ZnT8, IA2, GAD65 | 7.3   | weight loss          | yes            | no                                             |
| J1D013       | 45          | F   | 5 years          | LS           | ND                   | 7.5   | dyspepsia            | no             | Autoimmune gastritis<br>Hashimoto thyroiditis  |
| J1D014       | 19          | F   | 12 years         | LS           | INS, ZnT8, GAD65     | 7.1   | dyspepsia            | no             | Autoimmune gastritis<br>Hashimoto thyroiditis  |
| J1D017       | 45          | F   | 17 years         | LS           | neg                  | 7.4   | dyspepsia            | no             | Hashimoto thyroiditis                          |
| J1D018       | 57          | F   | 5 years          | LADA         | ND                   | 7.3   | dysphagia, dyspepsia | no             | Hashimoto thyroiditis                          |
| J1D019       | 38          | F   | 19 years         | LS           | INS, ICA, IA2        | 6.8   | dyspepsia            | no             | Graves disease,<br>Hashimoto thyroiditis       |
| J1D020       | 19          | M   | 5 years          | LS           | INS, IA2, GAD65      | 9.9   | dyspepsia            | no             | Hashimoto thyroiditis                          |
| J1D021       | 47          | F   | 3 years          | LS           | IA2, GAD65           | 9.3   | dyspepsia            | yes            | Sjögren syndrome,<br>Hashimoto thyroiditis     |
| J1D022       | 27          | F   | 23 years         | LS           | ND                   | 9.5   | none                 | yes            | no                                             |
| J1D023       | 20          | M   | <6 months        | NO           | ICA,ZnT8, IA2, GAD65 | 6.6   | none                 | yes            | no                                             |
| J1D024       | 46          | F   | 41 years         | LS           | ND                   | 6.9   | none                 | no             | Hashimoto thyroiditis,<br>Rheumatoid Arthritis |
| J1D025       | 34          | F   | 15 years         | LS           | ND                   | 8.4   | none                 | yes            | no                                             |

**Table S2:** Clinical Data of T1D patients enrolled in the study are shown. Diagnosis of T1D was based on the criteria of the American Diabetes Association. Some patients had gastrointestinal (GI) symptoms but turned out negative for any GI pathology. Five out of 17 patients were diagnosed for celiac disease based on histological examination of intestinal tissues (biopsies collected during the EGDS). In some cases, the islet autoantibody positivity was not documented (ND). NO= new onset; LS= long standing; LADA= Latent Autoimmune Diabetes in Adults.

| Micro and Macronutrients | DRV f/m         | Males T1D mean $\pm$ SD | Females T1D mean $\pm$ SD | Tot. T1D Patients mean $\pm$ SD |
|--------------------------|-----------------|-------------------------|---------------------------|---------------------------------|
| Protein, (g/day)         | 54/63           | 91,07 $\pm$ 21,12       | 59,90 $\pm$ 20,38         | 68,80 $\pm$ 24,6                |
| % (en)                   | 15-20           | 16,98 $\pm$ 0,04        | 16,66 $\pm$ 2,72          | 16,75 $\pm$ 0,03                |
| Carbohydrates, (g/day)   | 169-225/169-225 | 281,3 $\pm$ 102,70      | 180,57 $\pm$ 54,99        | 209,35 $\pm$ 82,2               |
| % (en)                   | 45-60           | 47,71 $\pm$ 0,10        | 45,58 $\pm$ 0,09          | 48,33 $\pm$ 0,09                |
| Sugars, (g/day)          | 0               | 62,51 $\pm$ 23,22       | 48,15 $\pm$ 25,45         | 52,25 $\pm$ 24,86               |
| % (en)                   | <15%            | 11 $\pm$ 0,03           | 13 $\pm$ 6                | 12 $\pm$ 5                      |
| Fat, (g/day)             | 33-58/33-58     | 82,57 $\pm$ 16,40       | 54,97 $\pm$ 20,11         | 62,21 $\pm$ 22,81               |
| % (en)                   | 20-35           | 35,13 $\pm$ 0,09        | 34,08 $\pm$ 0,06          | 34,38 $\pm$ 0,07                |
| Fiber, (g/day)           | 19-25           | 14, 65 $\pm$ 8,78       | 14,10 $\pm$ 6,63          | 13,3 $\pm$ 6,95                 |
| Ca(mg)                   | 1000            | 928,20 $\pm$ 315,91     | 609,62 $\pm$ 321,38       | 700,64 $\pm$ 341,82             |
| P(mg)                    | 700             | 1255,55 $\pm$ 470,32    | 930,32 $\pm$ 389,09       | 1023,25 $\pm$ 423,2             |
| K(mg)                    | 3900            | 2402,59 $\pm$ 1362, 76  | 1809,30 $\pm$ 845,51      | 2036,67 $\pm$ 990,54            |
| Na(mg)                   | 1100            | 1910,55 $\pm$ 171,35    | 1105,24 $\pm$ 523,35      | 1335,33 $\pm$ 582,18            |
| Fe(mg)                   | 10.00           | 11,81 $\pm$ 3,82        | 7,44 $\pm$ 3,39           | 8,69 $\pm$ 3,94                 |
| Zn(mg)                   | 11.00           | 6,00 $\pm$ 2,27         | 4,41 $\pm$ 1,66           | 4,87 $\pm$ 1,91                 |
| Cu(mg)                   | 0.9             | 1,21 $\pm$ 0,55         | 1,12 $\pm$ 0,57           | 1,14 $\pm$ 0,55                 |
| VIT B1(mg)               | 1.1/1.2         | 1,26 $\pm$ 0,28         | 0,87 $\pm$ 0,48           | 0,98 $\pm$ 0,46                 |
| VIT B2(mg)               | 1.3/1.6         | 1,75 $\pm$ 0,31         | 1,11 $\pm$ 0,51           | 1,30 $\pm$ 0,54                 |
| VIT B3(mg)               | 18              | 16,39 $\pm$ 7,96        | 12,29 $\pm$ 5,99          | 13,46 $\pm$ 6,57                |
| VIT A( $\mu$ g)          | 600/700         | 692,46 $\pm$ 289,76     | 644,03 $\pm$ 491,37       | 657,87 $\pm$ 432,48             |
| VIT C(mg)                | 85/105          | 145,81 $\pm$ 120,1      | 90,10 $\pm$ 58,18         | 106,02 $\pm$ 79,70              |

**Table S3:** Diet composition in terms of micro and macronutrients extrapolated from 3-day food diaries filled by our T1D cohort (14 out of 19 enrolled T1D patients filled the dietary questionnaire) at time of sample collection. Dietary Reference Values (DRV): reference intake levels of macro and micronutrients for the Italian population were reviewed in 2014 by the Italian Society of Human Nutrition (ref. Nutrition, Metabolism & Cardiovascular Diseases (2014) 24, e15ee17).

| Oligonucleotides    | Sequence                              |
|---------------------|---------------------------------------|
| H Reg3 $\alpha$ FW  | 5'- GGC ACC GAG CCC AAT G -3'         |
| H Reg3 $\alpha$ REV | 5'- GGA TTT CTC TCC CAT GCA AAG T -3' |
| HBD1 FW             | 5'- CGC CAT GAG AAC TTC CTA CC -3'    |
| HBD1 REV            | 5'- CCT CTG TAA CAG GTG CCT TG -3'    |
| HD5 FW              | 5'- GCT GAT GAG GCT ACA ACC CA 3'     |
| HD5 REV             | 5'- GAT TTC ACA CAC CCC GGA GA -3'    |
| HD6 FW              | 5'- AGG ACT TTG CCG TCT CCT TT -3'    |
| HD6 REV             | 5'- CCT TCT GCA ATG GCA AGT GA -3'    |
| HBD3 FW             | 5'-CTT CTG TTT GCT TTG CTC TTC C -3'  |
| HBD3 REV            | 5'- CAC TTG CCG ATC TGT TCC TC-3'     |
| HReg1 $\alpha$ FW   | 5'- ATC CTG GCT ACT GTG TGA GC -3'    |
| HReg1 $\alpha$ REV  | 5'- GTT GGA GAG ATG GTC CGG TTT -3'   |
| LL-37 FW            | 5'- GGA CAG TGA CCC TCA ACC AG -3'    |
| LL-37 REV           | 5'- AGG GCA CAC ACT AGG ACT CT -3'    |
| HReg3 $\gamma$ FW   | 5'- GGA CAG TGA CCC TCA ACC AG -3'    |
| HReg3 $\gamma$ REV  | 5'- AGG GCA CAC ACT AGG ACT CT -3'    |

**Table S4:** AMPs primers sequences.

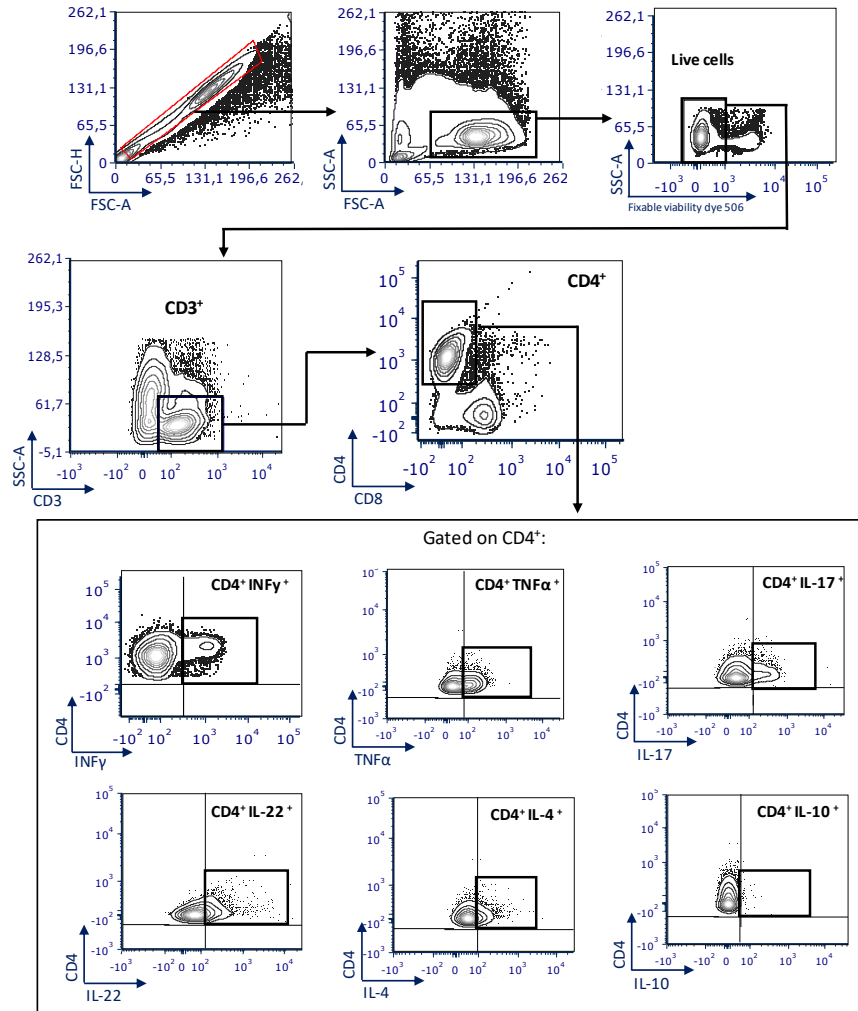

**Figure S1.** Flow cytometry gating strategy used to identify the following T cell subsets in peripheral blood and intestinal biopsies: Th1 cells (CD3<sup>+</sup>CD4<sup>+</sup>INF- $\gamma$ <sup>+</sup>), TNF- $\alpha$ <sup>+</sup> T cells (CD3<sup>+</sup>CD4<sup>+</sup> TNF- $\alpha$ <sup>+</sup>), Th17 cells (CD3<sup>+</sup> CD4<sup>+</sup>IL-17<sup>+</sup>), Th22 cells (CD3<sup>+</sup>CD4<sup>+</sup>IL-22<sup>+</sup>), Type 1 regulatory T (Tr1) cells (CD3<sup>+</sup>CD4<sup>+</sup>IL-10<sup>+</sup>), Th2 cells (CD3<sup>+</sup>CD4<sup>+</sup>IL-4<sup>+</sup>). Lymphocytes were gated based on SSC-A versus FSC-A and singlets were selected from the FSC-A versus FSC-H dot plot. Dead cells were excluded with Fixable Viability Dye eFluor 506 (FvD 506).

| Gene (species)                             | BaseMean    | Log2FoldChange | lfcSE        | stat         | p value        | FDR           |
|--------------------------------------------|-------------|----------------|--------------|--------------|----------------|---------------|
| <i>Clostridium butyricum</i>               | 1.716345307 | -1.175712929   | 0.5544662064 | -2.120441094 | 0.03396886422  | 0.2441829177  |
| <i>Bifidobacterium dentium</i>             | 1.651513134 | -0.965032398   | 0.4988014399 | -1.934698184 | 0.05302734339  | 0.2539974285  |
| <i>Roseburia intestinalis</i>              | 2.704207805 | -1.0306416     | 0.5393935137 | -1.910741553 | 0.05603780197  | 0.2539974285  |
| <i>Neisseria sicca</i>                     | 18.43711065 | 3.275541578    | 0.6823651198 | 4.800276983  | 1.58E-06       | 6.61E-04      |
| <i>Haemophilus parahaemolyticus</i>        | 258.8396091 | 3.669222472    | 0.9078592336 | 4.041620481  | 5.31E-05       | 0.01106782547 |
| <i>Neisseria lactamica</i>                 | 3.226694865 | 2.041784817    | 0.5416014257 | 3.769902958  | 1.63E-04       | 0.01919901169 |
| <i>Haemophilus influenzae</i>              | 9.227574429 | 2.484084565    | 0.6719634504 | 3.696755476  | 2.18E-04       | 0.01919901169 |
| <i>Selenomonas sp. oral taxon 136</i>      | 10.96738133 | 2.638241611    | 0.7193499657 | 3.667535604  | 2.45E-04       | 0.01919901169 |
| <i>Campylobacterium quincivale</i>         | 87.99943705 | 3.195214232    | 0.8786232757 | 3.636614599  | 2.76E-04       | 0.01919901169 |
| <i>Tepidimonas taiwanensis</i>             | 3.167867861 | -2.215070679   | 0.6401723558 | -3.460116107 | 5.40E-04       | 0.03216514723 |
| <i>Neisseria dentiae</i>                   | 7.224192508 | 2.594193009    | 0.7603236199 | 3.411958988  | 6.45E-04       | 0.03361948674 |
| <i>Acinetobacter haemolyticus</i>          | 3.350886808 | 1.932248849    | 0.5985949663 | 3.227976303  | 0.001246693011 | 0.05294633306 |
| <i>Muribaculum gordoncarteri</i>           | 4.11075764  | 1.913288095    | 0.5936831979 | 3.222742535  | 0.001269696236 | 0.05294633306 |
| <i>Helicobacter pylori</i>                 | 9.705930207 | -2.394338679   | 0.762188075  | -3.14140139  | 0.001681414191 | 0.06374088343 |
| <i>Lautropia mirabilis</i>                 | 6.181556095 | 1.832520976    | 0.6063970323 | 3.021982098  | 0.002511253989 | 0.08726607613 |
| <i>Neisseria bacilliformis</i>             | 6.150982055 | 1.961136044    | 0.6612286855 | 2.965896802  | 0.003018017404 | 0.09680871212 |
| <i>Clostridium isatidis</i>                | 2.434740246 | 1.730473621    | 0.6020795783 | 2.874160964  | 0.004051024442 | 0.1206626566  |
| <i>Prevotella sp. oral taxon 299</i>       | 656.2689203 | 2.417620532    | 0.8679447113 | 2.785454535  | 0.00534257354  | 0.1485986044  |
| <i>Selenomonas sp. S2-11-2</i>             | 11.87671304 | 1.996198541    | 0.7296112494 | 2.735975552  | 0.006219564658 | 0.1620974039  |
| <i>Tannerella serpentinaformis</i>         | 65.08174348 | -2.386619139   | 0.8984514013 | -2.656369766 | 0.007898695326 | 0.1937503501  |
| <i>Coprococcus comes</i>                   | 11.00939015 | -1.921993752   | 0.7385580446 | -2.602359783 | 0.009258466646 | 0.2074038689  |
| <i>Ralstonia mannitolilytica</i>           | 1.91869974  | -1.400213643   | 0.5410998567 | -2.587717638 | 0.009661414117 | 0.2074038689  |
| <i>Schaalia meyeri</i>                     | 87.01219177 | 1.957526242    | 0.7717481223 | 2.536776683  | 0.0118782961   | 0.2074038689  |
| <i>Clostridium botulinum</i>               | 7.045348424 | 1.668536201    | 0.6680912076 | 2.497467684  | 0.01250838656  | 0.2074038689  |
| <i>Granulicatella adiacens</i>             | 661.5589346 | 1.798967118    | 0.7329111178 | 2.454550183  | 0.01410609743  | 0.2074038689  |
| <i>Campylobacter sp. FDAARGOS_737</i>      | 11.01443355 | 1.84662536     | 0.7527587639 | 2.453143621  | 0.01416137849  | 0.2074038689  |
| <i>Corynebacterium matruchotii</i>         | 16.50594658 | 1.975311645    | 0.8080413614 | 2.444567493  | 0.01450259425  | 0.2074038689  |
| <i>Prevotella scopos</i>                   | 4.871916566 | 1.406651944    | 0.6062010965 | 2.442509511  | 0.01458554527  | 0.2074038689  |
| <i>Limosilactobacillus fermentum</i>       | 11.19375339 | -1.773460137   | 0.7277344372 | -2.436960581 | 0.01481129385  | 0.2074038689  |
| <i>Staphylococcus capitis</i>              | 2.771793486 | 1.394168916    | 0.5751430942 | 2.424038349  | 0.01534898456  | 0.2074038689  |
| <i>Bradyrhizobium sp. S2-11-2</i>          | 2.320540446 | 1.417212882    | 0.5867207508 | 2.415481097  | 0.01571443816  | 0.2074038689  |
| <i>Cupriavidus malaysiensis</i>            | 2.575675918 | -1.447058178   | 0.6003074541 | -2.410528418 | 0.0159294303   | 0.2074038689  |
| <i>Aggregatibacter aphrophilus</i>         | 2.349709511 | -1.259591539   | 0.5239966783 | -2.403815886 | 0.01622494255  | 0.2074038689  |
| <i>Cellvibrio sp. PSBB006</i>              | 3.900960445 | -1.49244904    | 0.6244173185 | -2.390146775 | 0.01684164073  | 0.2074038689  |
| <i>Saccharomonospora viridis</i>           | 1.820235587 | 1.276811402    | 0.5343680205 | 2.389418074  | 0.01687508706  | 0.2074038689  |
| <i>Planctomycetes sp. SH-PL14</i>          | 2.737238296 | 1.37255938     | 0.5745418867 | 2.388963122  | 0.01689599824  | 0.2074038689  |
| <i>Helicobacter suis</i>                   | 1.850172795 | 1.311631592    | 0.5495111125 | 2.388645143  | 0.0169106272   | 0.2074038689  |
| <i>Selenomonas timonae</i>                 | 1.828290542 | -1.298602689   | 0.5496529621 | -2.362586539 | 0.01814790382  | 0.2094343053  |
| <i>Ethanoligenes harbinense</i>            | 5.74521822  | 1.517588146    | 0.6433671168 | 2.358821435  | 0.0183307497   | 0.2094343053  |
| <i>Leptotrichia hostadii</i>               | 1.880654869 | -1.362057817   | 0.5786648045 | -2.353794124 | 0.01858289999  | 0.2094343053  |
| <i>Cardiobacterium sp. Marseille-Q4385</i> | 2.545977536 | 1.407498516    | 0.6025208137 | 2.336016423  | 0.01949038564  | 0.2138813371  |
| <i>Prevotella fusca</i>                    | 1.913402538 | 1.139020149    | 0.4978251616 | 2.287992325  | 0.02213796807  | 0.2367059663  |
| <i>Chitinibacter bivalviorum</i>           | 364.344508  | -1.677830255   | 0.7389158368 | -2.2706649   | 0.02316727141  | 0.2375019246  |
| <i>Ralstonia solanaceae</i>                | 1.863087557 | -1.212504896   | 0.5347003796 | -2.267634253 | 0.02335150818  | 0.2375019246  |
| <i>Haemophilus parainfluenzae</i>          | 20.64633987 | -1.498399526   | 0.6634956248 | -2.258341232 | 0.02392439358  | 0.2375050064  |
| <i>Streptococcus pyogenes</i>              | 639.0718264 | 1.937346078    | 0.8630356523 | 2.244804224  | 0.02478070347  | 0.2403151941  |
| <i>Acaryochloris sp. 'Moss Beach'</i>      | 81.53166032 | 1.490278338    | 0.669521783  | 2.225884767  | 0.02602190096  | 0.2441829177  |
| <i>Avibacterium paragallinarum</i>         | 3.16222305  | 1.27220647     | 0.5729823174 | 2.220324137  | 0.0263967726   | 0.2441829177  |
| <i>Enterococcus faecium</i>                | 1.8499219   | 1.068661278    | 0.4943171579 | 2.16189396   | 0.03062635064  | 0.2441829177  |
| <i>Blautia producta</i>                    | 2.703143235 | 1.016572858    | 0.4726516103 | 2.150786828  | 0.03149302925  | 0.2441829177  |
| <i>Desulfosporosipho bilsoniae</i>         | 1.881645753 | -1.20973927    | 0.5223028369 | -2.14621451  | 0.03185586844  | 0.2441829177  |
| <i>Desulfosporosipho bilsoniae</i>         | 1.878398045 | 1.102713689    | 0.5143315027 | 2.143974621  | 0.03203492033  | 0.2441829177  |
| <i>Melanospasma orale</i>                  | 2.339353709 | -1.16057149    | 0.5432133989 | -2.136492752 | 0.03263927111  | 0.2441829177  |
| <i>Streptomyces albidiflavus</i>           | 2.079336728 | 1.094423544    | 0.5133273286 | 2.132018857  | 0.03300529641  | 0.2441829177  |
| <i>Actinobacillus pleuropneumoniae</i>     | 3.837209608 | 1.205512082    | 0.5665601231 | 2.131197419  | 0.0330728816   | 0.2441829177  |
| <i>Nosocomioides ampullae</i>              | 1.715888594 | 1.158265368    | 0.5436068341 | 2.130704206  | 0.033111351834 | 0.2441829177  |
| <i>Pseudomonas veronii</i>                 | 1.818299767 | 1.151527774    | 0.5427047529 | 2.12183101   | 0.03385193154  | 0.2441829177  |
| <i>Burkholderia stabilis</i>               | 1.711778172 | -1.172896575   | 0.5538823344 | -2.117591593 | 0.03420967082  | 0.2441829177  |
| <i>Sphingomonas sp. CL5.1</i>              | 1.71611695  | -1.158361834   | 0.5483001602 | -2.112641793 | 0.03463143876  | 0.2441829177  |
| <i>Bacillus cereus</i>                     | 6.190862661 | 1.054518294    | 0.4994485054 | 2.111365401  | 0.03474091654  | 0.2441829177  |
| <i>Veillonella parvula</i>                 | 579.1467171 | 1.712754559    | 0.8143819029 | 2.103134356  | 0.03545402655  | 0.2441829177  |
| <i>Treponema vincentii</i>                 | 4.497433977 | 1.366556613    | 0.6519066937 | 2.096245714  | 0.0360603999   | 0.2441829177  |
| <i>Abiotrophia defectiva</i>               | 2.941263517 | 1.268755717    | 0.6054054209 | 2.095712515  | 0.03610770096  | 0.2441829177  |
| <i>Selenomonas sp. oral taxon 478</i>      | 16.02108988 | 1.575323578    | 0.7552580854 | 2.085808293  | 0.03699599192  | 0.2441829177  |
| <i>Bergeyella cardium</i>                  | 3.528912865 | 1.22261386     | 0.5869816329 | 2.082882652  | 0.03726192131  | 0.2441829177  |
| <i>Barnesiella viscericola</i>             | 2.909967404 | 1.169124584    | 0.5626097476 | 2.078038265  | 0.03770583489  | 0.2441829177  |
| <i>Nitratireductor kimveonaensis</i>       | 1.750397232 | -1.08943756    | 0.5252363083 | -2.074185509 | 0.0380620855   | 0.2441829177  |
| <i>Coprococcus sp. ART55/1</i>             | 1.659911911 | -1.099197066   | 0.5343668962 | -2.05700816  | 0.03968544094  | 0.2507398314  |
| <i>Aquicella siphonis</i>                  | 1.692721671 | 1.123530526    | 0.5508123971 | 2.039769861  | 0.04137325302  | 0.2539974285  |
| <i>Labilithrix luteola</i>                 | 1.944439086 | 1.060539973    | 0.5213045428 | 2.034396185  | 0.04191166619  | 0.2539974285  |
| <i>Neisseria subflava</i>                  | 69.66804013 | 1.767711956    | 0.723279705  | 2.026430443  | 0.04272069391  | 0.2539974285  |
| <i>Halomonas sp. 1513</i>                  | 1.755305309 | -1.091659608   | 0.5392359123 | -2.024456427 | 0.04292321093  | 0.2539974285  |
| <i>Clostridium borinense</i>               | 5.357928631 | 1.253724179    | 0.6236754556 | 2.010218885  | 0.04440802745  | 0.2539974285  |
| <i>Acidaminococcus intestini</i>           | 1.650621482 | -1.093823851   | 0.5441958436 | -2.009982002 | 0.0444309377   | 0.2539974285  |
| <i>Arachidococcus sp. B520</i>             | 2.348855499 | -1.070684331   | 0.5340695507 | -2.004766289 | 0.04498803802  | 0.2539974285  |
| <i>Leptotrichia sp. oral taxon 221</i>     | 31.76621978 | -1.586714598   | 0.7936789681 | -1.999189422 | 0.0455878626   | 0.2539974285  |
| <i>Rothia mucilaginosa</i>                 | 270.5770136 | 1.562183322    | 0.7837345194 | 1.98325573   | 0.04623345134  | 0.2539974285  |
| <i>Bacillus subtilis</i>                   | 2.769879758 | 0.9129299177   | 0.4586547587 | 1.990451206  | 0.04654125392  | 0.2539974285  |
| <i>Acetivibrio saccincola</i>              | 3.655597176 | 1.101975141    | 0.5589973885 | 1.981978987  | 0.04748159256  | 0.2539974285  |
| <i>Leptotrichia trevisanii</i>             | 4.75186434  | 1.382220527    | 0.6979873748 | 1.980294454  | 0.04767045159  | 0.2539974285  |
| <i>Prevotella dentalis</i>                 | 33.77698419 | 1.490633708    | 0.7552766614 | 1.973628716  | 0.04842397605  | 0.2539974285  |
| <i>Polynucleobacter necessarius</i>        | 1.783636682 | -1.007551536   | 0.5164876713 | -1.95077558  | 0.05108374804  | 0.2539974285  |
| <i>Rubrivivax gelatinosus</i>              | 1.943071389 | 1.062109329    | 0.5445735064 | 1.950350718  | 0.05113433146  | 0.2539974285  |
| <i>Heliorestis convoluta</i>               | 1.61775957  | -1.051052368   | 0.5389898784 | -1.950044269 | 0.05117084287  | 0.2539974285  |
| <i>Megamonas funiformis</i>                | 1.583030213 | 0.9883126139   | 0.508500767  | 1.943581363  | 0.05194595505  | 0.2539974285  |
| <i>Prevotella intermedia</i>               | 304.7174959 | -1.496029384   | 0.7754353591 | -1.929276717 | 0.05369651858  | 0.2539974285  |
| <i>Actinomyces gaoshouyi</i>               | 1.587901925 | 0.9905330531   | 0.5143044219 | 1.925966433  | 0.05410856526  | 0.2539974285  |
| <i>Streptococcus dysgalactiae</i>          | 16.39884628 | 1.13943222     | 0.5413070357 | 1.925788922  | 0.05413073528  | 0.2539974285  |
| <i>Bacteroides zoogeloformans</i>          | 1.550435281 | -0.961482083   | 0.5008243557 | -1.919798972 | 0.05488329683  | NA            |
| [ <i>Clostridium</i> ] innocuum            | 1.583755874 | 0.9885444343   | 0.5151314981 | 1.919013762  | 0.05498259218  | 0.2539974285  |
| <i>Pseudomonas sp. ZUD3-0.4C(B344-21)</i>  | 1.620951604 | 1.03507591     | 0.5396204994 | 1.91815528   | 0.05509132475  | 0.2539974285  |
| <i>Corynebacterium croficum</i>            | 1.613877505 | 1.030978737    | 0.5387040056 | 1.913813015  | 0.05564405195  | 0.2539974285  |
| <i>Hippaea maritima</i>                    | 1.613877505 | 1.030978737    | 0.5387040056 | 1.913813015  | 0.05564405195  | 0.2539974285  |
| [ <i>Ruminococcus</i> ] gnavus             | 4.569921838 | 1.298984693    | 0.683085453  | 1.900799628  | 0.05732826283  | 0.2570525333  |
| <i>Bacillus sp. RZ2MS9</i>                 | 1.777501997 | 0.9871830217   | 0.52         |              |                |               |

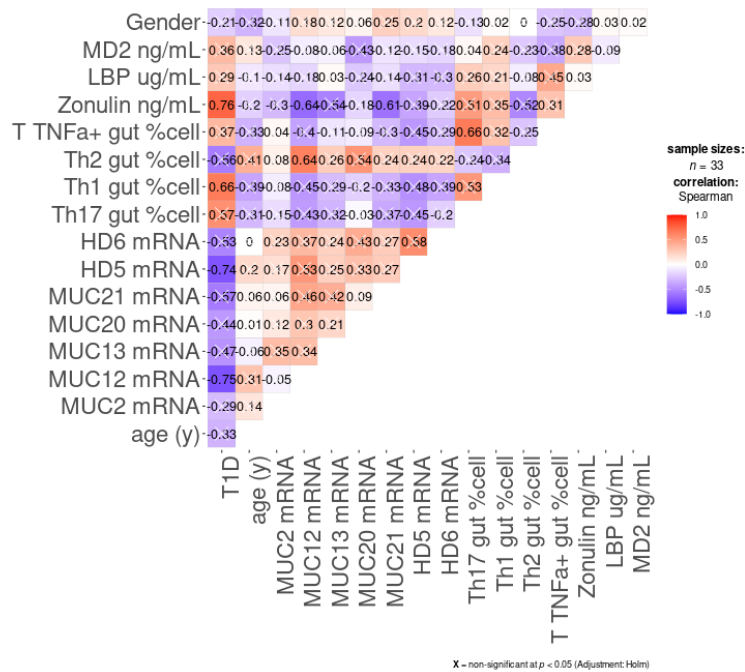

**Figure S2.** Nonparametric multivariate analysis was performed with the ggstatplot R package (<https://joss.theoj.org/papers/10.21105/joss.03167>) with a significance level = 0.05, confidence level = 0.95, and Bonferroni–Holm method for multiple comparison p-value adjustment.
